# Supplementary material for: Live birth rate after female fertility preservation for cancer or haematopoietic stem cell transplantation: a systematic review and meta-analysis of the three main techniques; embryo, oocyte and ovarian tissue cryopreservation
Source: PubMed Central journal article supplement — Hum Reprod. 2022 Nov 24;38(3):489–502. doi: 10.1093/humrep/deac249 (PMC9977128; doi:10.1093/humrep/deac249), 2022-11-24
Supplement: deac249_supplementary_data_file.pdf [file deac249_supplementary_data_file.pdf]

## Supplementary data

### Supplementary appendix

The MEDLINE search strategies were as follows:

#### Oocyte

("fertility preservation"[MH] OR ((preservation[TW] OR "prevention and control"[SH]) AND (fertility[MH] OR fertility[TW]))) OR oncofertility[TW] OR onco-fertility[TW] OR cancer[TW] OR neoplasms[MH] OR oncolog\*[TW] OR "stem cell transplantation"[MH] OR "haematopoietic stem cell transplantation"[MH] OR HSCT[TW] OR (("stem cell\*[TW] OR "bone marrow"[TW]) AND "transplant\*[TW])) AND ((oocytes[MH] OR oocyte\*[TW] OR ovum[MH] OR ovum[TW] OR ova[TW] OR egg[TW] OR eggs[TW]) AND (vitrication[MH] OR vitrication[TW] OR vitrified[TW] OR cryopreservation[MH] OR cryoconserv\*[TW] OR cryopreserv\*[TW] OR freez\*[TW] OR frozen[TW])) AND ("live birth"[MH] OR "livebirth"[TW] OR (live[TW] AND birth[TW]) OR infant[MH] OR infant[TW] OR babies[TW] OR newborn\*[TW] OR "delivery, obstetric"[MH] OR deliver\*[TW] OR "reproductive outcome\*[TW] OR "pregnancy outcome"[MH]) AND 2004/01/01:2021/06/30[DP] AND (English[LA] OR French[LA]) AND (humans[MH] OR "Hum Reprod"[TA] OR "Hum Reprod Open"[TA] OR patients[MH] OR patients[TW] OR women[MH] OR women[TW])).

#### Embryo

("fertility preservation"[MH] OR ((preservation[TW] OR "prevention and control"[SH]) AND (fertility[MH] OR fertility[TW]))) OR oncofertility[TW] OR onco-fertility[TW] OR cancer[TW] OR neoplasms[MH] OR oncolog\*[TW] OR "stem cell transplantation"[MH] OR "haematopoietic stem cell transplantation"[MH] OR HSCT[TW] OR (("stem cell\*[TW] OR "bone marrow"[TW]) AND "transplant\*[TW])) AND ((embryo[MH]

OR embryo\*[TW] OR ((fertilized[TW] OR fertilized[TW]) AND (oocytes[MH] OR oocyte\*[TW] OR ovum[MH] OR ovum[TW] OR ova[TW] OR egg[TW] OR eggs[TW]))) AND (vitrication[MH] OR vitrication[TW] OR vitrified[TW] OR cryopreservation[MH] OR cryoconserv\*[TW] OR cryopreserv\*[TW] OR freez\*[TW] OR frozen[TW])) AND ("live birth"[MH] OR "livebirth"[TW] OR (live[TW] AND birth[TW]) OR infant[MH] OR infant[TW] OR babies[TW] OR newborn\*[TW] OR "delivery, obstetric"[MH] OR deliver\*[TW] OR "reproductive outcome\*[TW] OR "pregnancy outcome"[MH]) AND 2004/01/01:2021/06/30[DP] AND (English[LA] OR French[LA]) AND (humans[MH] OR "Hum Reprod"[TA] OR "Hum Reprod Open"[TA] OR patients[MH] OR patients[TW] OR women[MH] OR women[TW])).

#### Ovarian tissue

("fertility preservation"[MH] OR ((preservation[TW] OR "prevention and control"[SH]) AND (fertility[MH] OR fertility[TW]))) OR oncofertility[TW] OR onco-fertility[TW] OR cancer[TW] OR neoplasms[MH] OR oncolog\*[TW] OR "stem cell transplantation"[MH] OR "haematopoietic stem cell transplantation"[MH] OR "bone marrow transplantation"[MH] OR HSCT[TW] OR (("stem cell\*[TW] OR "bone marrow"[TW]) AND "transplant\*[TW])) AND ((ovarian\*[TW] OR ovary[TW] OR ovarii[TW]) AND (tissues[MH] OR tissue\*[TW] OR cortex[TW]) AND (vitrication[MH] OR vitrication[TW] OR vitrified[TW] OR cryopreservation[MH] OR cryoconserv\*[TW] OR cryopreserv\*[TW] OR freez\*[TW] OR frozen[TW] OR implant\*[TW] OR transplant\*[TW])) AND ("live birth"[MH] OR "livebirth"[TW] OR (live[TW] AND birth[TW]) OR infant[MH] OR infant[TW] OR babies[TW] OR newborn\*[TW] OR "delivery, obstetric"[MH] OR deliver\*[TW] OR "reproductive outcome\*[TW] OR "pregnancy outcome"[MH]) AND 2004/01/01:2021/06/30[DP] AND (English[LA] OR French[LA]) AND (humans[MH] OR "Hum Reprod"[TA] OR "Hum Reprod Open"[TA] OR patients[MH] OR patients[TW] OR women[MH] OR women[TW])).
